# Supplementary material
Source: publisher figshare collection journal article supplement (https://aacr.figshare.com/ndownloader/files/39806297)
Supplement: Supplementary file 1 [file 39806297]

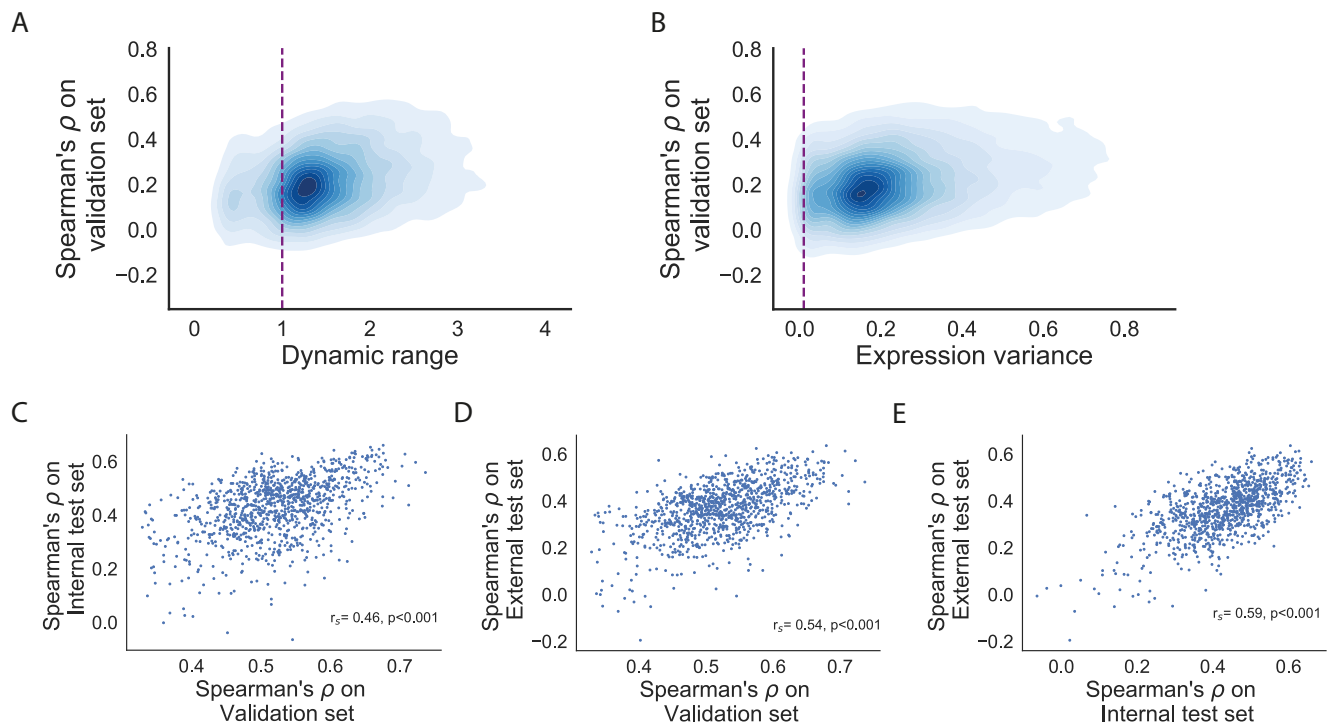

**Supplementary Figure 1** **A**, Distribution of Spearman's Rho on validation set with respect of dynamic range Spearman's Rho. Dynamic range was defined as the log2 unit between 2nd and 98th percentile of each gene expression. Dashed line highlighted the one log2 unit threshold. **B**, Distribution of Spearman's Rho on validation set with respect of dynamic range. Dashed line highlighted variance of 0.01, which was applied as the inclusion criteria in current study. Only genes with a variance higher than 0.01 were retained in the analysis. **C**, Concordance of Spearman correlation coefficients, describing the relationship between RNA-seq expression and predicted expression for each gene, in the validation and internal test set. **D**, Concordance of Spearman correlation coefficients between validation and external test set. **E**, Concordance of Spearman correlation coefficients between internal and external test sets.
